# Supplementary material for: Compounds from the Petroleum Ether Extract of Wedelia chinensis with Cytotoxic, Anticholinesterase, Antioxidant, and Antimicrobial Activities
Source: MDPI journal article supplement (doi:10.3390/molecules28020793), 2023-01-13
Supplement: s1 [file s1]

## Supplementary Materials

# Compounds from the Petroleum Ether Extract of *Wedelia chinensis* with Cytotoxic, Anticholinesterase, Antioxidant, and Antimicrobial Activities

Md. Abdur Rashid Khan <sup>1</sup>, Md. Aminul Islam <sup>2</sup>, Kushal Biswas <sup>1,3</sup>, Md. Yusuf Al-Amin <sup>1,4</sup>, Md. Salim Ahammed <sup>1,5</sup>, Md. Imran Nur Manik <sup>1,6</sup>, KM Monirul Islam <sup>1</sup>, Md. Abdul Kader <sup>1</sup>, A.H.M. Khurshid Alam <sup>1</sup>, Shahed Zaman <sup>2</sup> and Golam Sadik <sup>1,\*</sup>

<sup>1</sup> Department of Pharmacy, University of Rajshahi, Rajshahi 6205, Bangladesh

<sup>2</sup> Department of Chemistry, University of Rajshahi, Rajshahi 6205, Bangladesh

<sup>3</sup> Department of Biomedical and Nutritional Sciences, Zuckerberg College of Health Sciences, University of Massachusetts Lowell, Lowell, MA 01854, USA

<sup>4</sup> Purdue University Interdisciplinary Life Sciences Graduate Program, Purdue University, West Lafayette, IN 47907, USA

<sup>5</sup> Basic Biomedical Sciences, Sanford School of Medicine, University of South Dakota, Vermillion, SD 57069, USA

<sup>6</sup> Department of Bioscience, Graduate School of Science and Technology, National University Corporation Shizuoka University, 836 Ohyo, Suruga-ku, Shizuoka 422-8529, Japan

\* Correspondence: gsadik2@ru.ac.bd

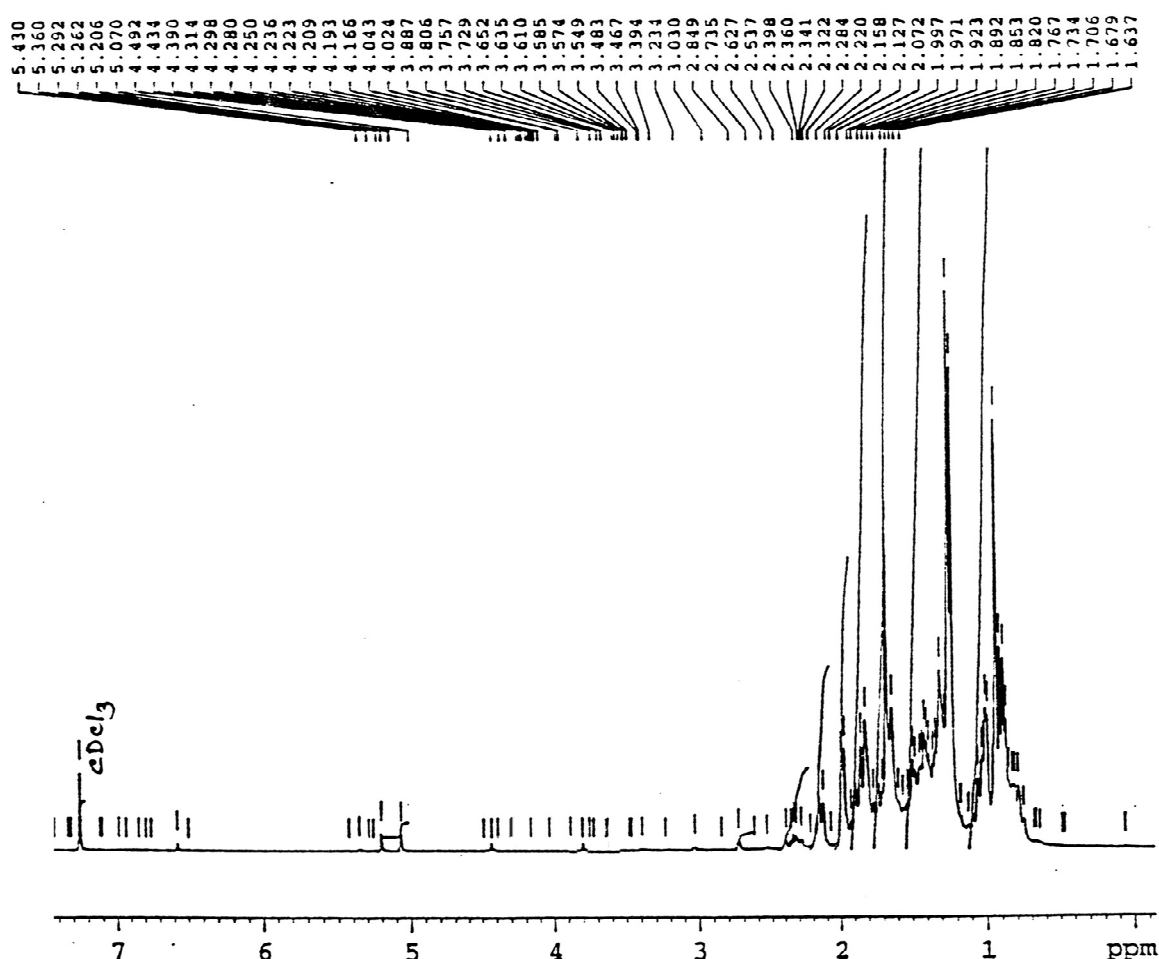

Figure S1. <sup>1</sup>H NMR (400 MHz, CDCl<sub>3</sub>) spectrum of compound 1.

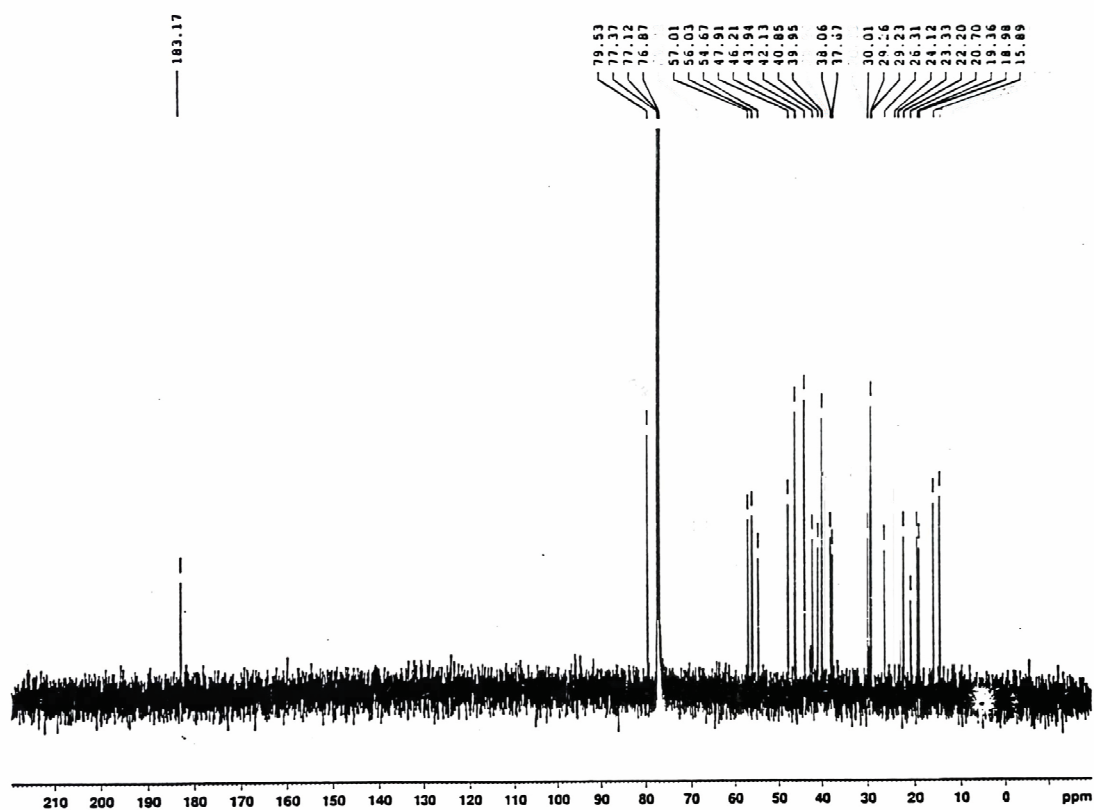

Figure S2.  $^{13}\text{C}$  NMR (100 MHz,  $\text{CDCl}_3$ ) spectrum of compound 1.

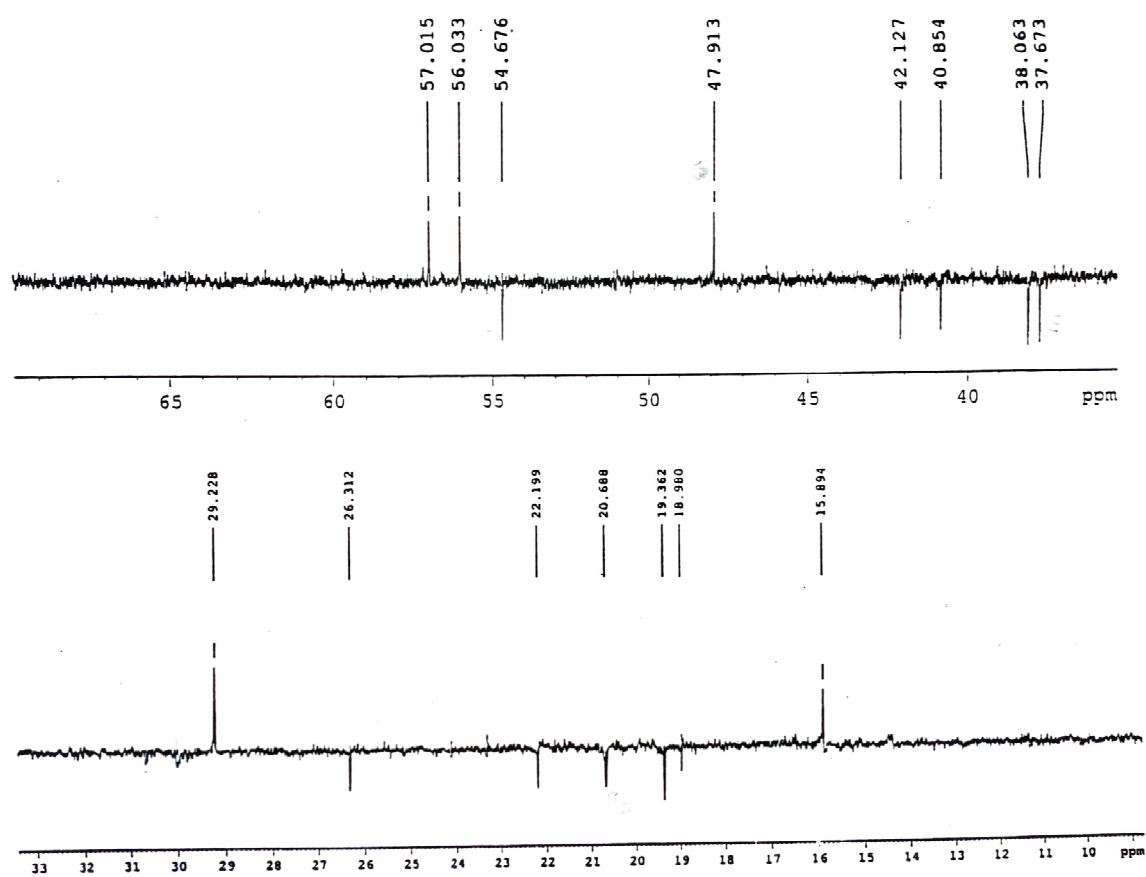

Figure S3.  $^{13}\text{C}$  NMR DEPT 135° (400 MHz,  $\text{CDCl}_3$ ) spectrum of compound 1.

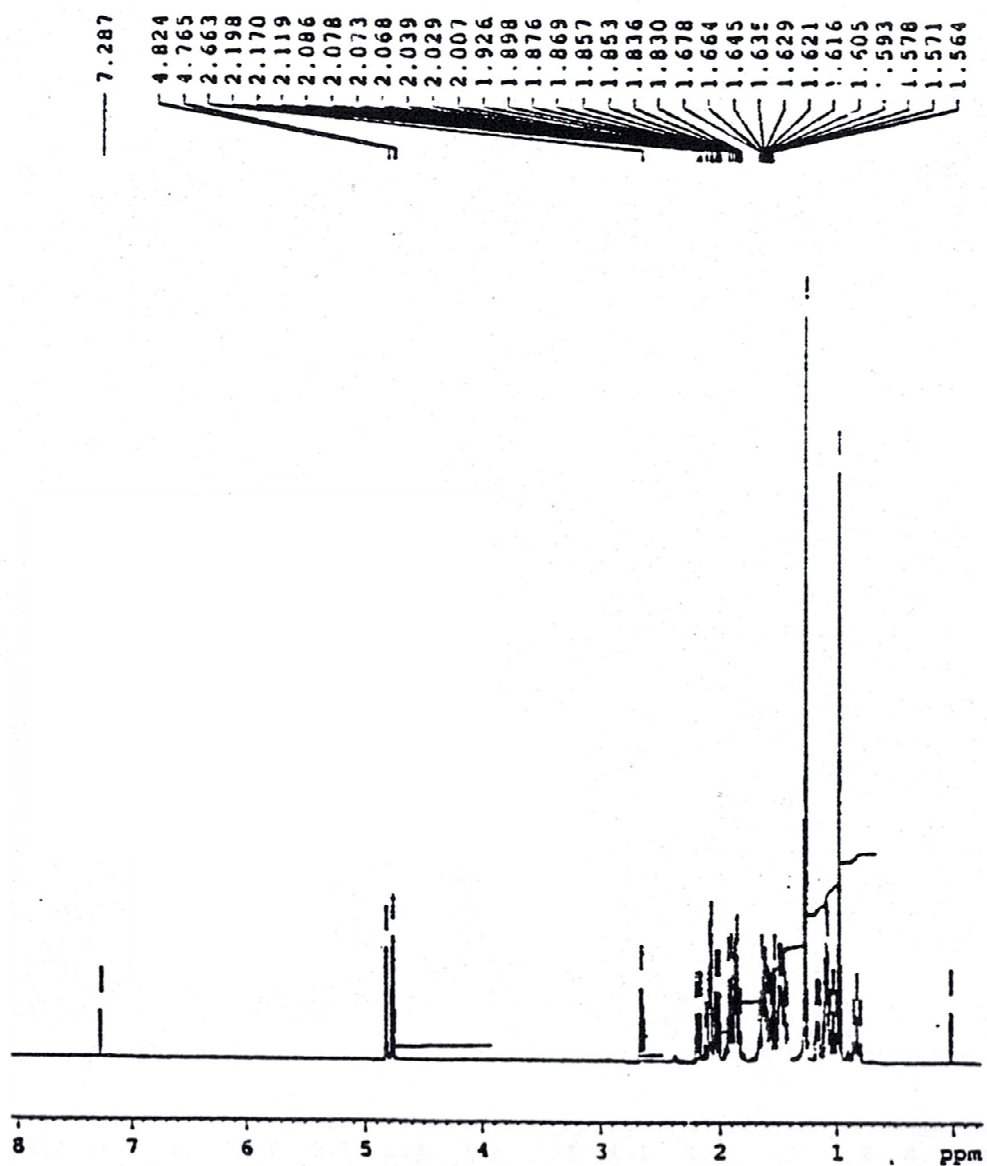

Figure S4.  $^1\text{H}$  NMR (400 MHz,  $\text{CDCl}_3$ ) spectrum of compound 2.



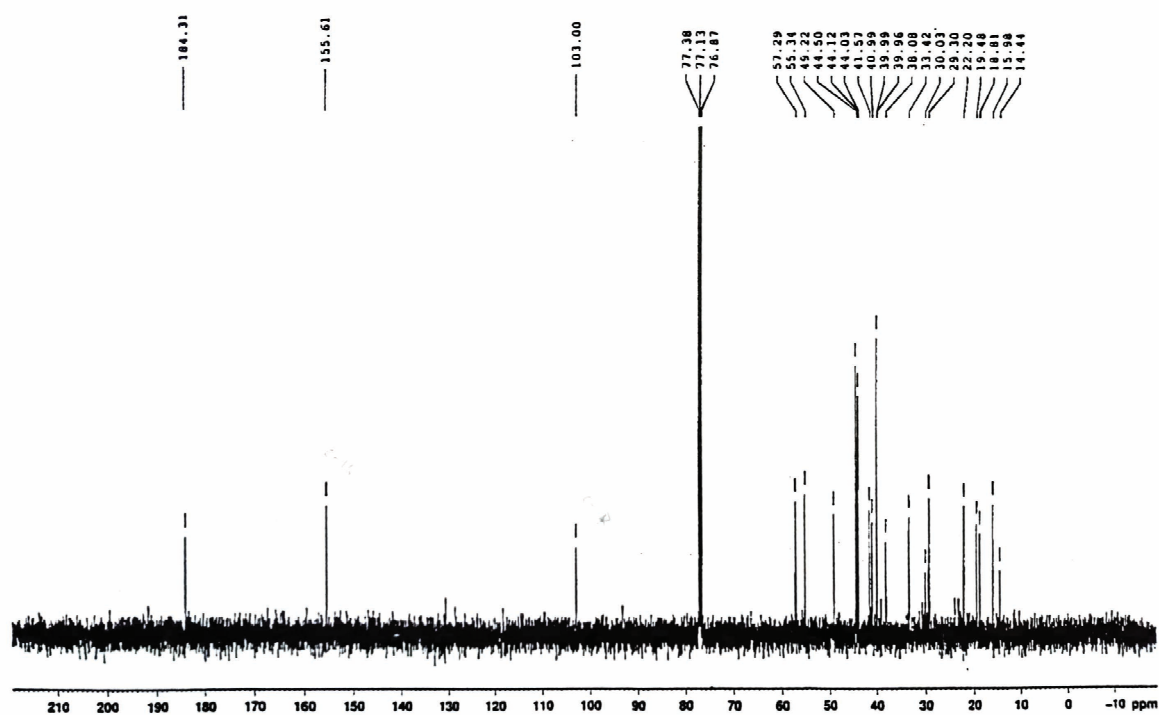

Figure S5.  $^{13}\text{C}$  NMR (400 MHz,  $\text{CDCl}_3$ ) spectrum of compound 2.

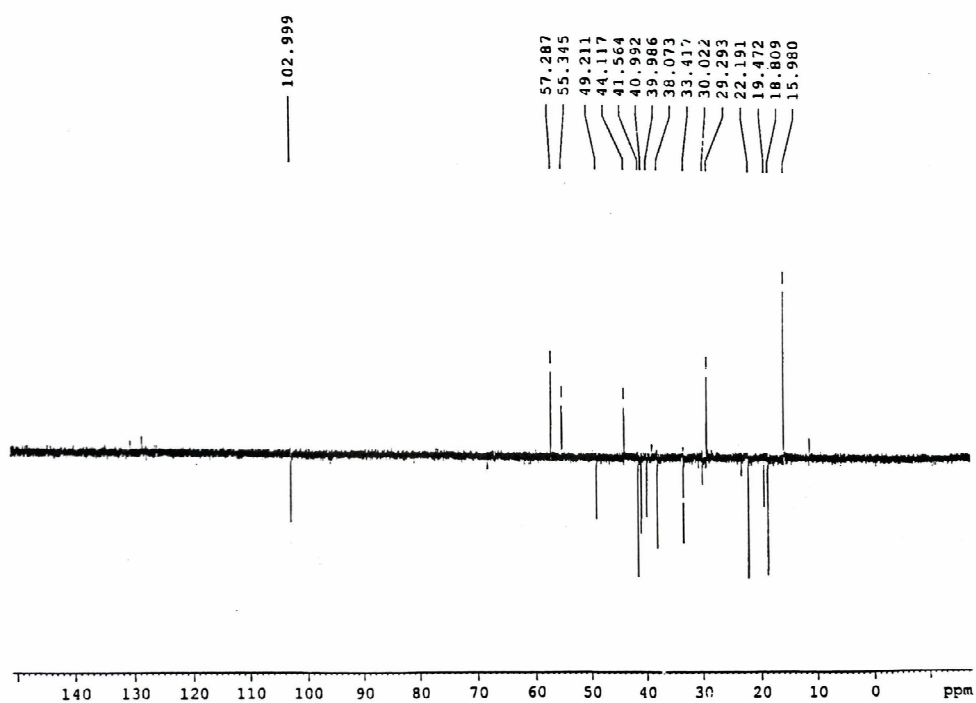

Figure S6.  $^{13}\text{C}$  NMR DEPT  $135^\circ$  (400 MHz,  $\text{CDCl}_3$ ) spectrum of compound 2.

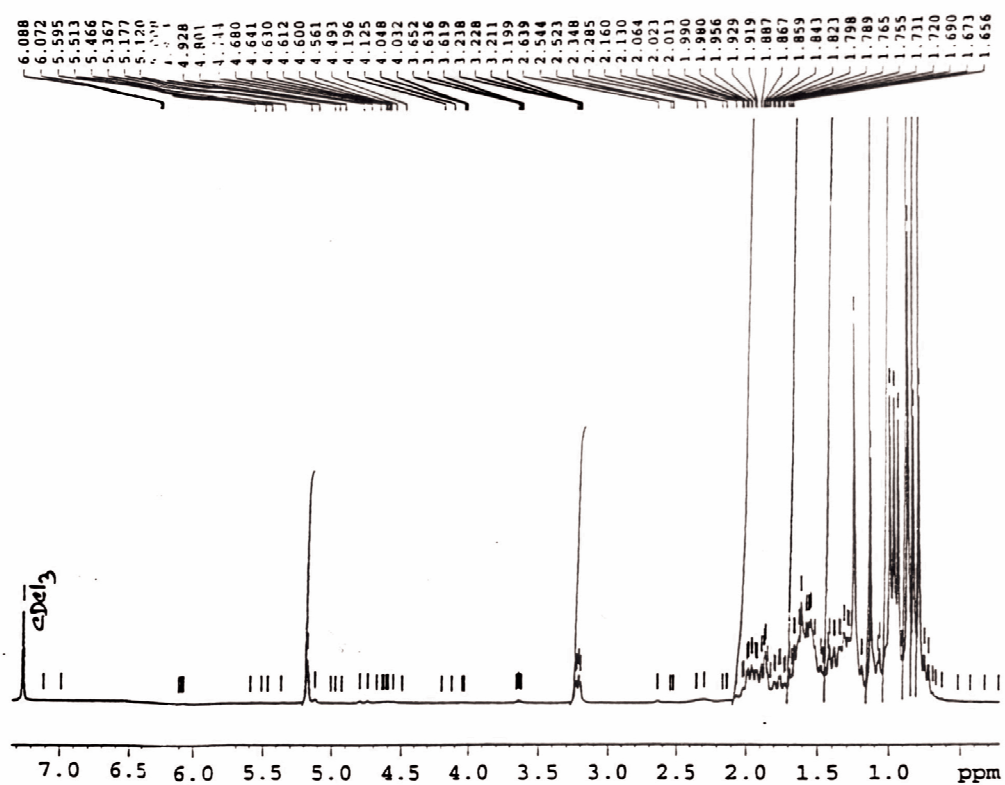

Figure S7. <sup>1</sup>H NMR (400 MHz, CDCl<sub>3</sub>) spectrum of compound 3.

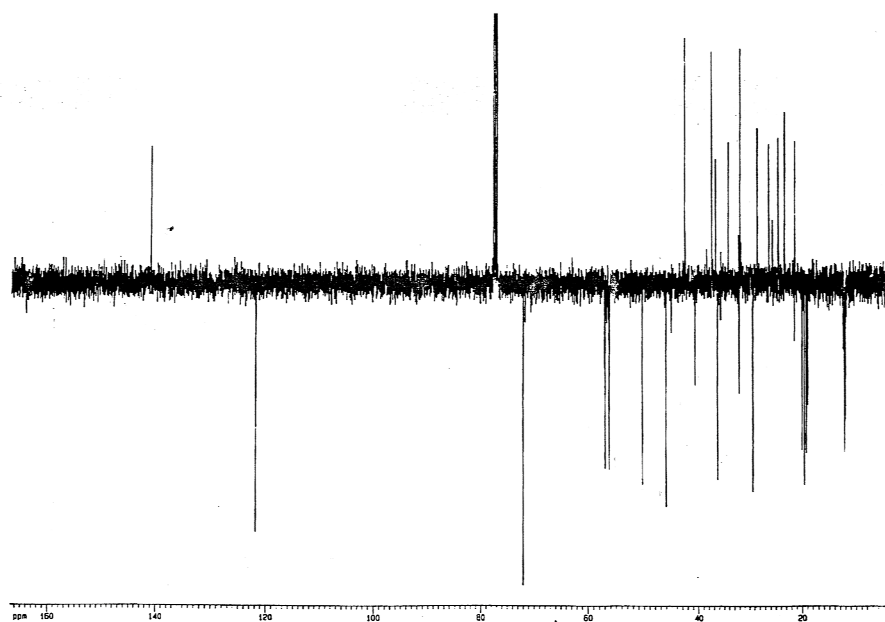

Figure S8. <sup>13</sup>C NMR DEPT 135° (400 MHz, CDCl<sub>3</sub>) spectrum of compound 3.

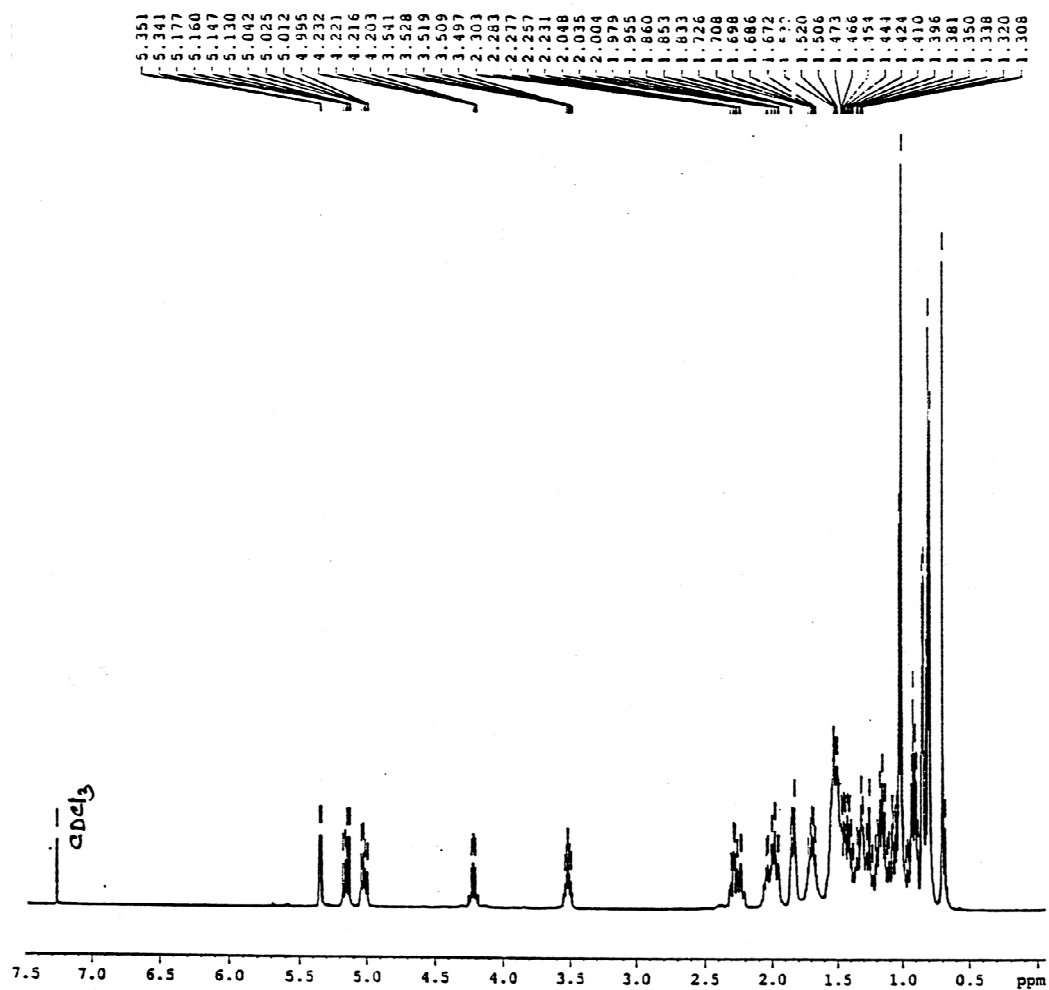

Figure S9.  $^1\text{H}$  NMR (400 MHz,  $\text{CDCl}_3$ ) spectrum of compound 4.

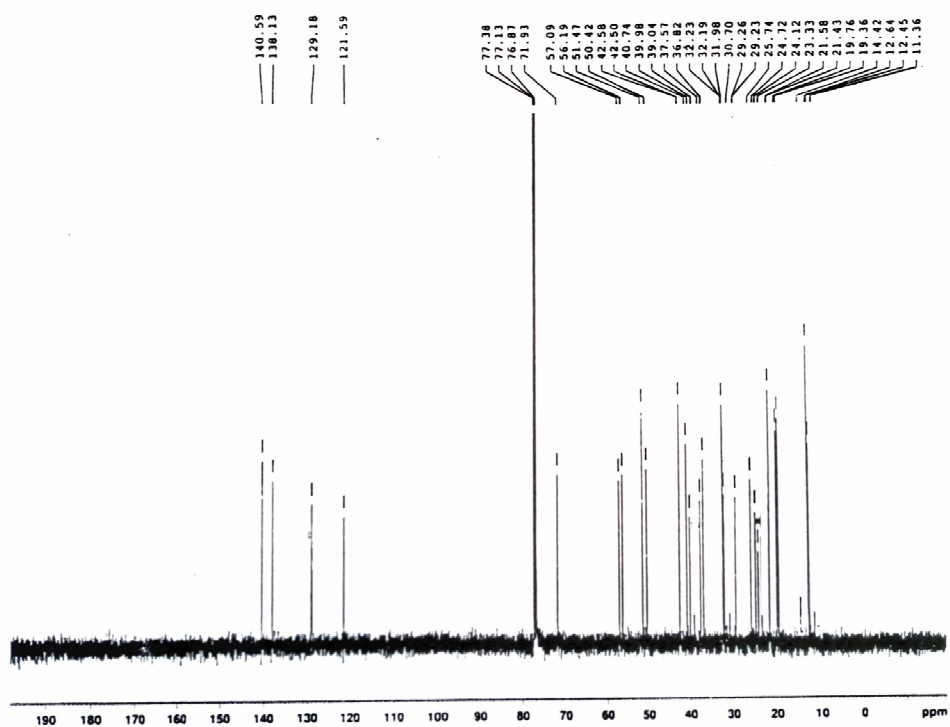

Figure S10.  $^1\text{H}$  NMR (400 MHz,  $\text{CDCl}_3$ ) spectrum of compound 4.

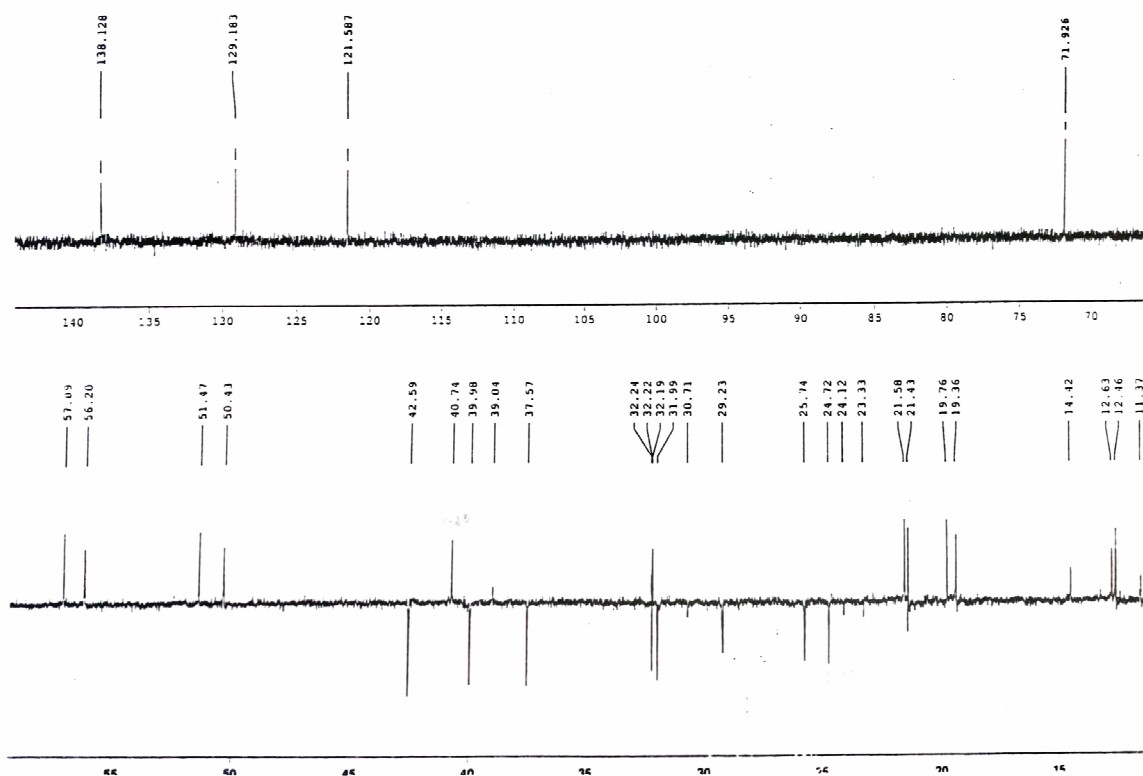

Figure S11.  $^{13}\text{C}$  NMR DEPT 135° (400 MHz,  $\text{CDCl}_3$ ) spectrum of compound 4.
